# Supplementary material
Source: MDPI journal article supplement (https://www.mdpi.com/2673-4834/3/1/23)

**Supplementary Table S1: Major rainfall events in the different regions of coastal pains of Tamil Nadu**

| Event Group | Date of Event | Chennai          | Cuddalore-Pondicherry | Cauvery Delta | Ramanathapuram | Thoothukudi-Kanniyakumari |
|-------------|---------------|------------------|-----------------------|---------------|----------------|---------------------------|
| 2015-1      | 02-10-2015    | Heavy            |                       |               |                |                           |
|             | 03-10-2015    |                  | Heavy                 |               |                |                           |
|             | 04-10-2015    |                  |                       | Heavy         |                |                           |
|             | 09-10-2015    | Heavy            |                       |               |                |                           |
|             | 08-11-2015    |                  |                       | Very Heavy    |                |                           |
|             | 09-11-2015    |                  | Very Heavy            | Very Heavy    |                |                           |
|             | 13-11-2015    | Heavy            |                       |               |                |                           |
|             | 14-11-2015    |                  | Heavy                 | Heavy         |                |                           |
|             | 15-11-2015    | Extreamely Heavy |                       |               |                |                           |
|             | 16-11-2015    | Heavy            |                       |               |                |                           |
|             | 22-11-2015    |                  | Very Heavy            |               |                |                           |
| 2015-2      | 01-12-2015    | Extreamely Heavy | Extreamely Heavy      |               |                |                           |
|             | 03-12-2015    |                  |                       | Heavy         |                |                           |
|             | 08-12-2015    |                  |                       | Heavy         |                | Heavy                     |
| 2016-1      | 12-12-2016    | Heavy            |                       |               |                |                           |
| 2017-1      | 30-10-2017    |                  |                       | Heavy         |                |                           |
|             | 10-11-2017    |                  | Heavy                 | Heavy         |                |                           |
|             | 30-11-2017    |                  |                       |               |                | Heavy                     |
| 2018-1      | 03-10-2018    |                  |                       |               | Very Heavy     |                           |
|             | 04-10-2018    |                  | Very Heavy            |               |                |                           |
|             | 05-10-2018    |                  |                       | Heavy         | Very Heavy     |                           |

|        |            |  |       |       |  |       |
|--------|------------|--|-------|-------|--|-------|
| 2018-2 | 01-11-2018 |  |       | Heavy |  |       |
|        | 02-11-2018 |  |       |       |  | Heavy |
|        | 15-11-2018 |  |       | Heavy |  |       |
|        | 21-11-2018 |  | Heavy |       |  |       |
|        | 22-11-2018 |  | Heavy |       |  |       |
|        | 23-11-2018 |  |       | Heavy |  |       |

|        |            |       |  |       |       |       |
|--------|------------|-------|--|-------|-------|-------|
| 2019-1 | 21-10-2019 | Heavy |  | Heavy | Heavy |       |
|        | 30-11-2019 |       |  | Heavy |       | Heavy |
|        | 20-12-2019 |       |  |       |       | Heavy |

|        |            |  |       |       |       |       |
|--------|------------|--|-------|-------|-------|-------|
| 2020-1 | 21-10-2020 |  |       | Heavy |       |       |
|        | 13-11-2020 |  |       |       | Heavy | Heavy |
|        | 16-11-2020 |  | Heavy |       |       | Heavy |

|        |            |            |            |            |  |  |
|--------|------------|------------|------------|------------|--|--|
| 2020-2 | 24-11-2020 | Heavy      | Heavy      | Heavy      |  |  |
|        | 25-11-2020 | Very Heavy |            | Very Heavy |  |  |
|        | 26-11-2020 | Very Heavy | Very Heavy |            |  |  |

|        |            |  |                  |            |       |       |
|--------|------------|--|------------------|------------|-------|-------|
| 2020-3 | 03-12-2020 |  |                  | Very Heavy | Heavy |       |
|        | 04-12-2020 |  | Extreamely Heavy | Very Heavy | Heavy |       |
|        | 05-12-2020 |  |                  | Heavy      | Heavy | Heavy |
|        | 07-12-2020 |  |                  | Heavy      |       |       |

|        |            |            |                  |            |       |  |
|--------|------------|------------|------------------|------------|-------|--|
| 2021-1 | 06-01-2021 | Very Heavy |                  |            |       |  |
|        | 07-01-2021 |            | Heavy            |            |       |  |
|        | 12-01-2021 |            |                  | Very Heavy |       |  |
|        | 13-01-2021 |            | Extreamely Heavy | Very Heavy |       |  |
|        | 15-01-2021 |            |                  |            | Heavy |  |

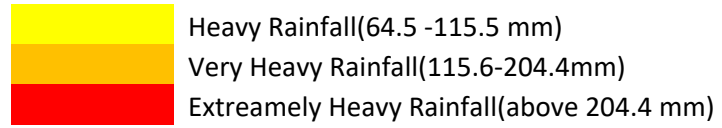

Supplement: s1 [file s1 › Supplement-Table S1.pdf]
