# Supplementary material
Source: MDPI journal article supplement (https://www.mdpi.com/2673-4834/3/1/23)
Supplement: s1 [file s1]

Archive with 3 entries (3 files):
- Supplement-File S1.pdf
- Supplement-File S2.pdf
- Supplement-Table S1.pdf
