# Supplementary material
Source: MDPI journal article supplement (https://www.mdpi.com/2673-4834/3/1/23)
Supplement: s1 [file s1 › Supplement-File S2.pdf]

## Supplementary File S2: Classifications code of built-ups

| Code | Type                                                     |
|------|----------------------------------------------------------|
| 1    | Residential, Very Dense, Single Floor, Planned           |
| 2    | Residential, Moderate Dense, Single Floor, Planned       |
| 3    | Residential, Low Dense, Single Floor, Planned            |
| 4    | Residential, Sparse, Single Floor, Planned               |
| 5    | Residential, Very Dense, Multi < 4 floors, Planned       |
| 6    | Residential, Moderate Dense, Multi < 4 floors, Planned   |
| 7    | Residential, Low Dense, Multi < 4 floors, Planned        |
| 8    | Residential, Sparse, Multi < 4 floors, Planned           |
| 9    | Residential, Very Dense, Multi > 5 floors, Planned       |
| 10   | Residential, Moderate Dense, Multi > 5 floors, Planned   |
| 11   | Residential, Low Dense, Multi > 5 floors, Planned        |
| 12   | Residential, Sparse, Multi > 5 floors, Planned           |
| 13   | Residential, Very Dense, Single Floor, Unplanned         |
| 14   | Residential, Moderate Dense, Single Floor, Unplanned     |
| 15   | Residential, Low Dense, Single Floor, Unplanned          |
| 16   | Residential, Sparse, Single Floor, Unplanned             |
| 17   | Residential, Very Dense, Multi < 4 floors, Unplanned     |
| 18   | Residential, Moderate Dense, Multi < 4 floors, Unplanned |
| 19   | Residential, Low Dense, Multi < 4 floors, Unplanned      |
| 20   | Residential, Sparse, Multi < 4 floors, Unplanned         |
| 21   | Residential, Very Dense, Multi > 5 floors, Unplanned     |
| 22   | Residential, Moderate Dense, Multi > 5 floors, Unplanned |
| 23   | Residential, Low Dense, Multi > 5 floors, Unplanned      |
| 24   | Residential, Sparse, Multi > 5 floors, Unplanned         |
| 25   | Hamlet Very Dense                                        |
| 26   | Hamlet Moderate Dense                                    |
| 27   | Hamlet Low Dense                                         |
| 28   | Hamlet Sparse                                            |
| 29   | Small Industry                                           |
| 30   | Large Industry                                           |
